# Supplementary material for: Improving timely medical reviews for patients discharged from intensive care
Source: PubMed Central journal article supplement — BMJ Qual Improv Rep. 2015 Sep 9;4(1):u207871.w3816. doi: 10.1136/bmjquality.u207871.w3816 (PMC4693071; doi:10.1136/bmjquality.u207871.w3816), 2015-09-09
Supplement: bmjqir-4-u207871-w3816-s2.pdf [file bmjqir-4-u207871-w3816-s2.pdf]

| <b>Outcome Measure</b>                                                            | <b>Baseline Data</b>                                                                                                                                   | <b>PDSA Cycle 1 Data (Post interventions @ 3 months)</b> | <b>PDSA Cycle 2 Data (Post interventions @ 6 months)</b> |
|-----------------------------------------------------------------------------------|--------------------------------------------------------------------------------------------------------------------------------------------------------|----------------------------------------------------------|----------------------------------------------------------|
| <b>Number of patients discharged from ICU</b>                                     | 138                                                                                                                                                    | 42                                                       | 40                                                       |
| <b>Percentage of patients reviewed by RMO within 6 hours of arrival onto ward</b> | 22%                                                                                                                                                    | 45%                                                      | 70%                                                      |
| <b>Percentage of patients requiring acute review by evening or night RMO</b>      | 14%<br><ul style="list-style-type: none"> <li>- 2 patients had been reviewed &lt;6hrs</li> <li>- 17 patients had not been reviewed &lt;6hrs</li> </ul> | 0%                                                       | 0%                                                       |
| <b>Percentage of patients requiring readmission to ICU</b>                        | 2%<br><ul style="list-style-type: none"> <li>- No patients readmitted to ICU had been reviewed &lt;6hrs</li> </ul>                                     | 0%                                                       | 0%                                                       |
